# Supplementary material for: Synthesis, characterization and properties of ternary copper(ii) complexes containing reduced Schiff base N-(2-hydroxybenzyl)-α-amino acids and 1,10-phenanthrolineElectronic supplementary information (ESI) available: ESI-MS and UV titration data. See http://www.rsc.org/suppdata/dt/b2/b211496h/
Source: Royal Society of Chemistry journal article supplement (doi:10.1039/b211496h), 2003-01-28

# Synthesis, Characterization and Properties of Ternary Copper(II) Complexes of Reduced Schiff Base *N*-(2-Hydroxybenzyl)- $\alpha$ -Amino Acids and 1,10-Phenanthroline

Chang-Tong Yang,<sup>a</sup> Boujemaa Moubaraki,<sup>b</sup> Keith S. Murray,<sup>b</sup> and Jagadese J. Vittal<sup>a</sup>

<sup>a</sup> Department of Chemistry, National University of Singapore, Singapore 117543

<sup>b</sup> School of Chemistry, Monash University, PO Box 23, Victoria, 3800, Australia

## Electronic Supplementary Information:

Fig. S1. ESI-MS of **1** in MeOH.

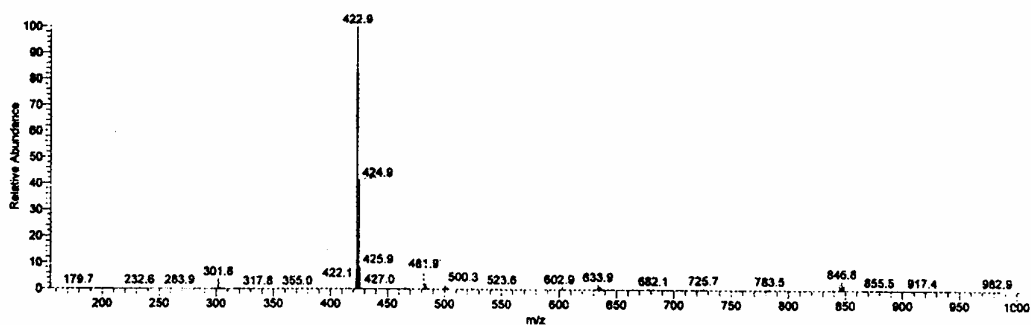

Fig. S2. ESI-MS of **2** in MeOH.

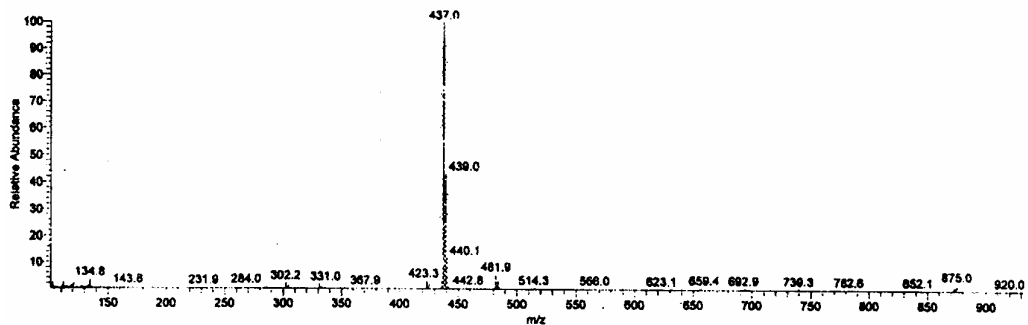

Fig. S3. ESI-MS of 3 in MeOH.

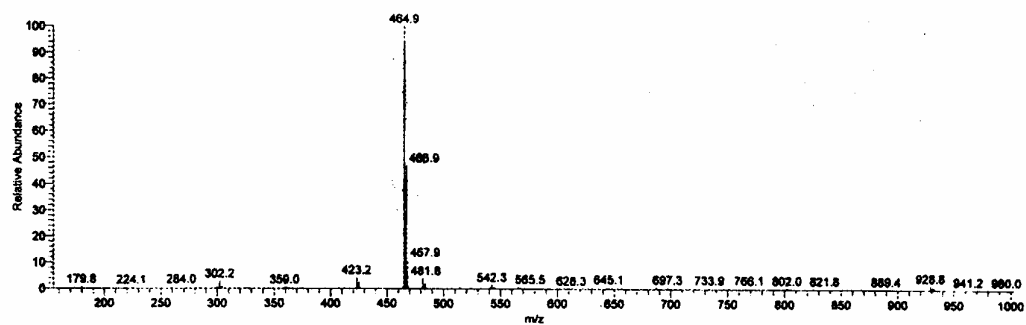

Fig. S4. ESI-MS of 4 in MeOH.

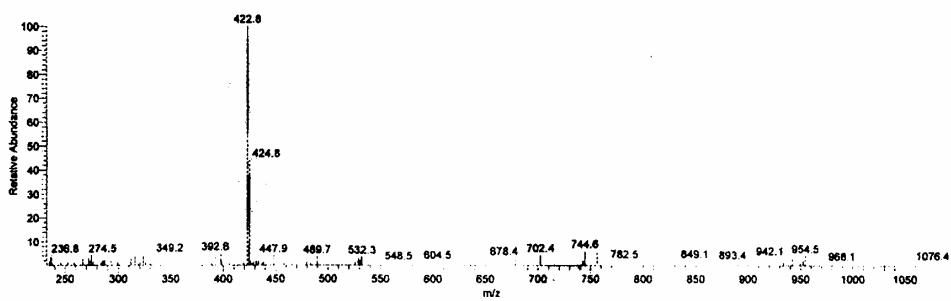

Fig. S5. ESI-MS of 5 in MeOH.

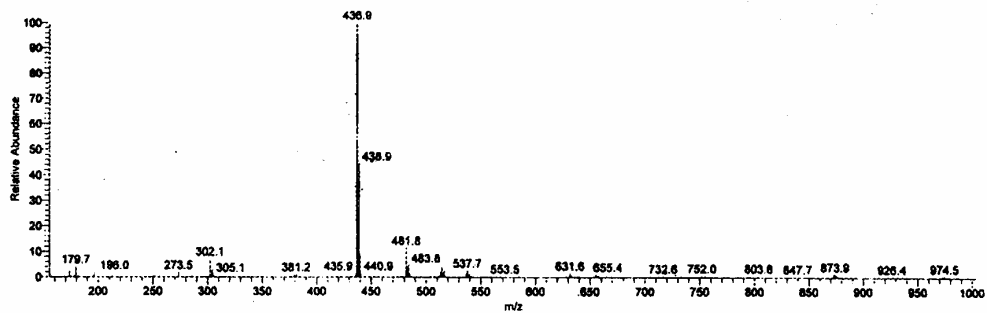

Fig. S6. ESI-MS of 6 in MeOH.

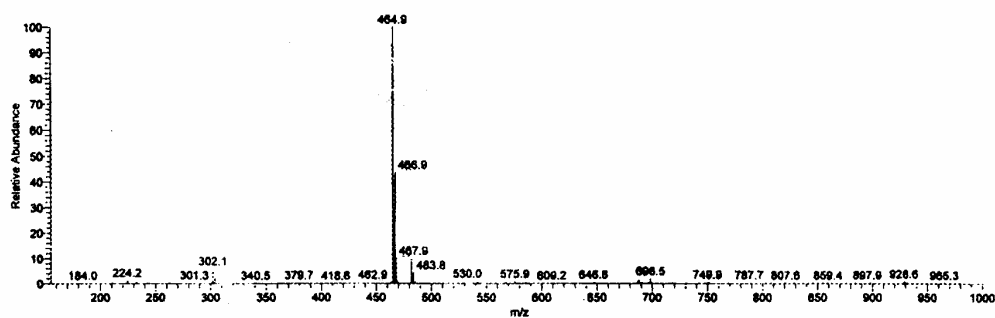

**Please Note:** The ESI-MS obtained by the addition of equimolar  $\text{HClO}_4$  to **1-3** are the same as in Fig. S4-S6. Similarly, the ESI-MS of the products obtained by addition of equimolar  $\text{HClO}_4$  to  $\text{Cu}(\text{ClO}_4)_2 + \text{H}_2\text{L} + \text{phen} + 2\text{LiOH}$  solution are identical to Fig. S4-S6. Although the neutral and protonated compounds could not be distinguished by ESI-MS, the color of the solution (green, **1-3** and blue, **4-6**) and isolation of the products and subsequent characterization confirmed their identity.

Fig. S7. ESI-MS of 7 in MeOH.

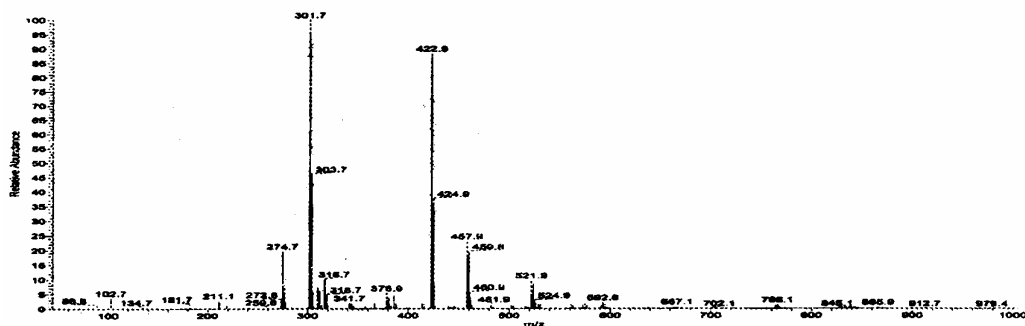

Fig. S8. ESI-MS of **8** in MeOH.

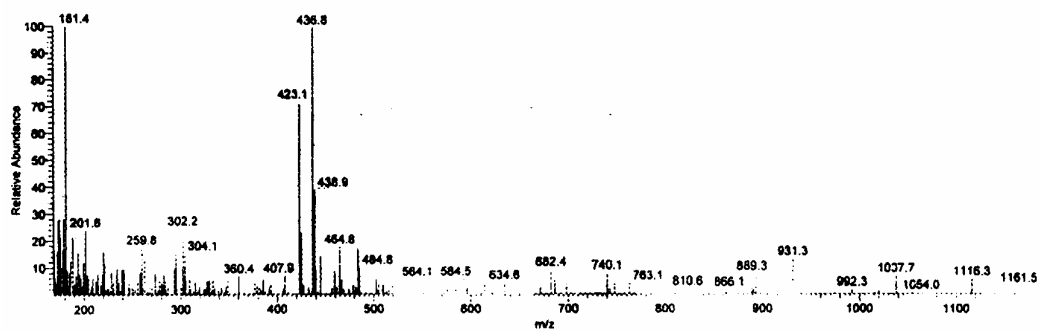

Fig. S9. ESI-MS of **9** in MeOH.

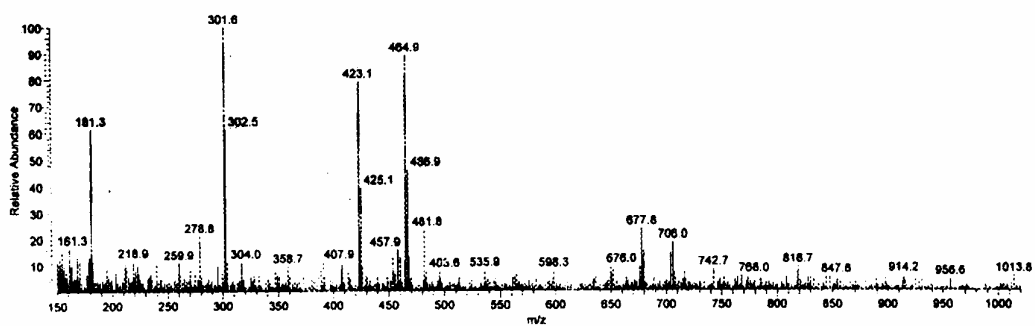

Fig. S10. ESI-MS of solution after addition of equimolar NaOH to **4**.

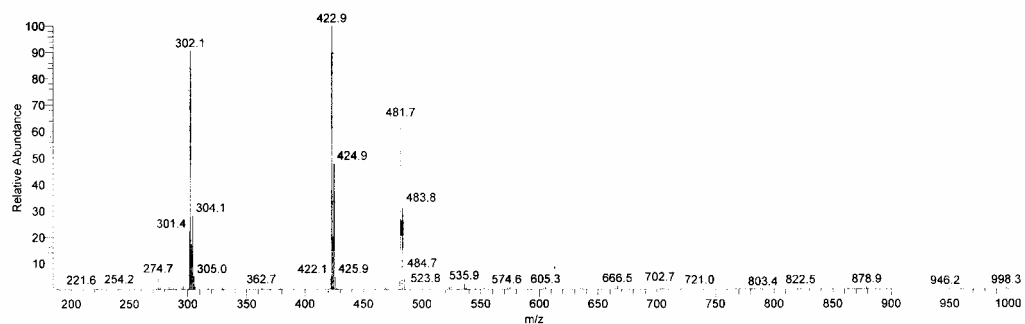

Fig. S11. ESI-MS of solution after addition of equimolar NaOH to **5**.

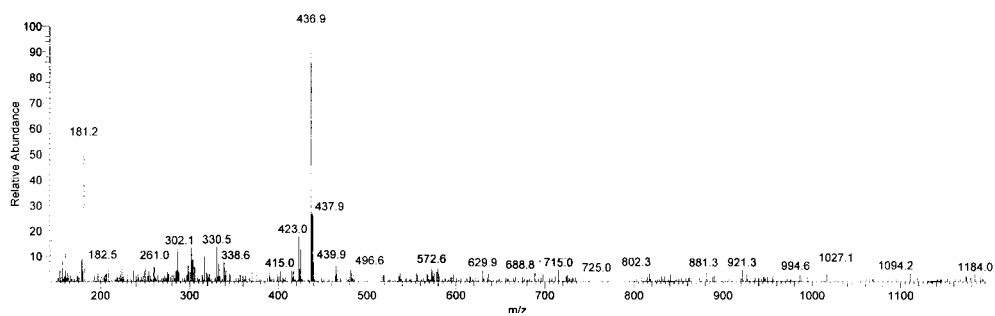

Fig. S12. ESI-MS of solution after addition of equimolar NaOH to **6**.

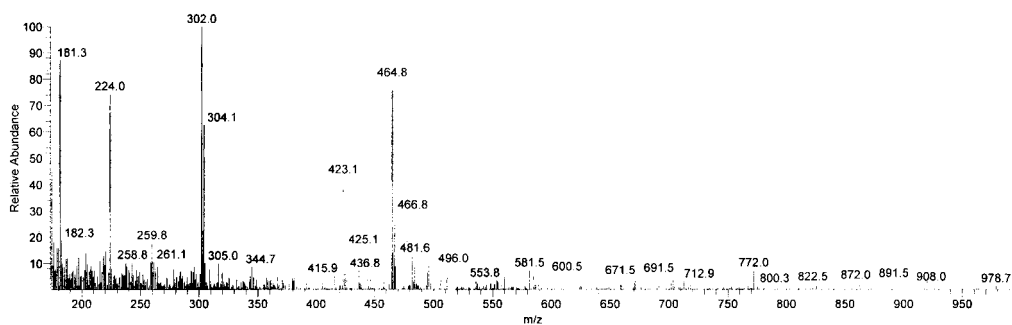

Fig. S13. ESI-MS of solution containing  $[\text{Cu}(\text{OAc})_2 + \text{H}_2\text{sgly} + \text{phen} + \text{LiOH}]$  showing the band due to  $[\text{Cu}(\text{Hsgly})(\text{phen})(\text{OAc}) + \text{H}^+]$  ( $m/z = 481.8$ ).

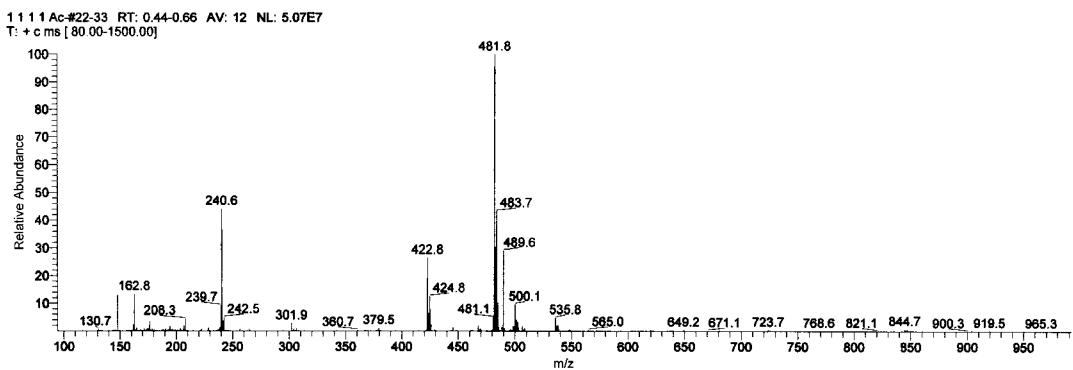

**Please Note:**

- ✓ The ESI-MS of the products obtained from  $\text{Cu}(\text{ClO}_4)_2 + \text{H}_2\text{L} + \text{phen} + 2\text{LiOH}$  in MeOH solution are identical to Fig. S10-S12.
- ✓ The ESI-MS of the products obtained by the addition of equimolar  $\text{NaClO}_4$  to **1-3** are identical to those obtained by addition equimolar  $\text{NaOH}$  to **4-6**.
- ✓ The ESI-MS of **1**+ $\text{NaOH}$ , **2**+ $\text{NaOH}$  and **3**+ $\text{NaOH}$  are identical to that of the neutral compounds, **1-3**.

Fig. S14. Variation of UV-vis spectra for the mononuclear **2** by addition of an aqueous  $\text{HClO}_4$  indicate the formation of **5**.

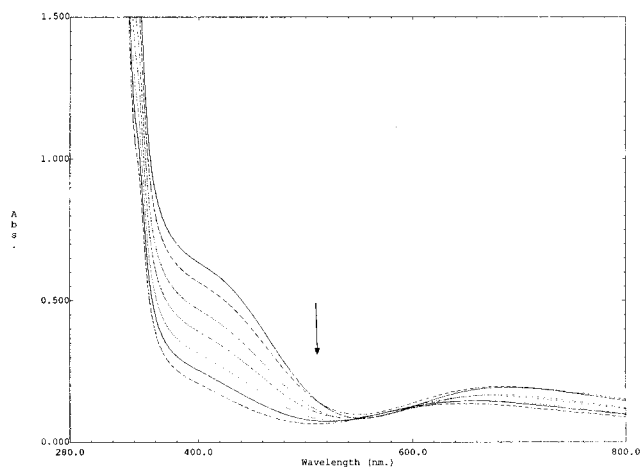

Fig. S15. UV-vis spectra of **2** (——) and Mixture of  $[\text{Cu}(\text{ClO}_4)_2 + \text{H}_2\text{sala} + \text{phen} + 2\text{LiOH}]$  (-----) to indicate the difference between them.

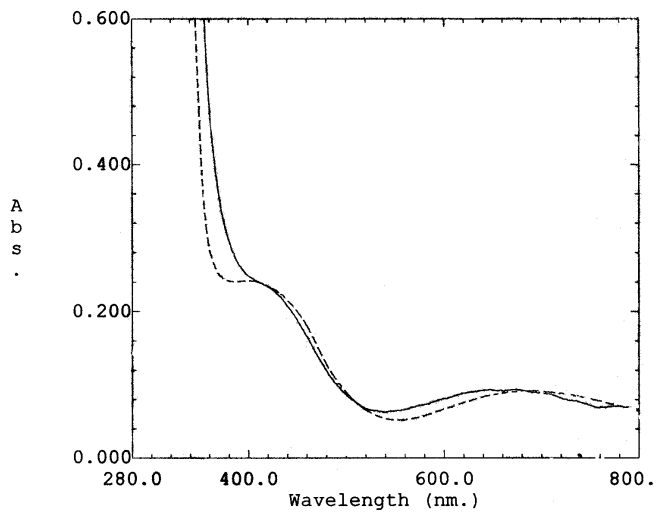

Fig. S16. Variation of UV-vis spectra by the addition of equimolar of NaOH to **5** which spectra is the same as the spectra of  $[\text{Cu}(\text{ClO}_4)_2 + \text{H}_2\text{Sala} + \text{phen} + 2\text{LiOH}]$  solution but not the spectra of **2**.

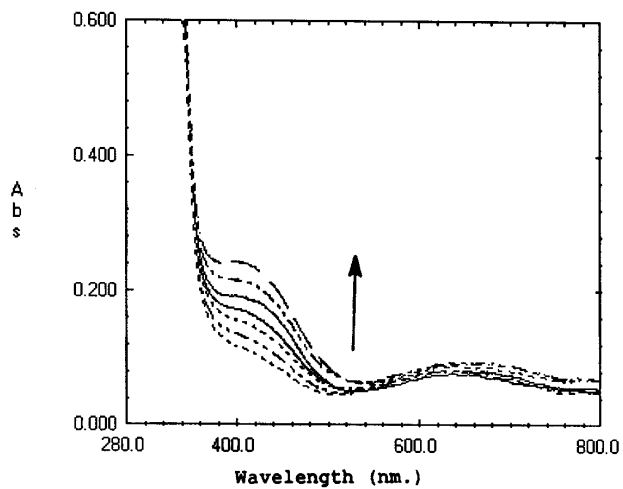

Fig. S17. Variation of UV-vis spectra by the addition of equimolar of HClO<sub>4</sub> to [Cu(ClO<sub>4</sub>)<sub>2</sub> + H<sub>2</sub>sala + phen + 2LiOH] indicate formation of **5**

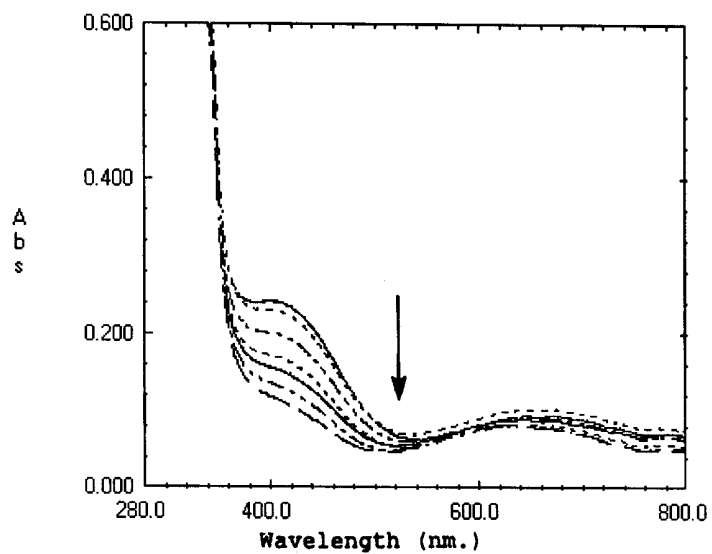

Supplement: b211496h.pdf [file b211496h.pdf]
